# Supplementary material
Source: MDPI journal article supplement (https://www.mdpi.com/2225-1154/11/3/58)
Supplement: s1 [file s1]

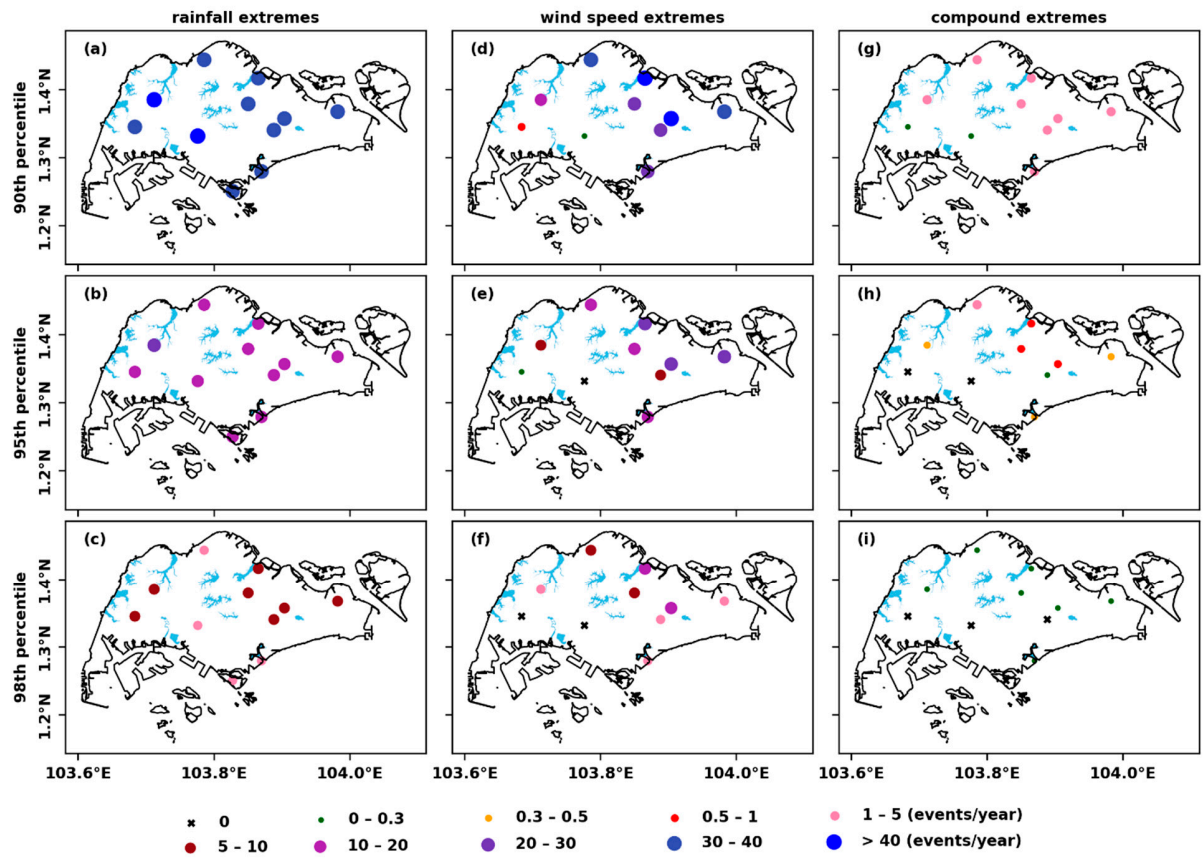

**Figure S1.** Frequency (events/year) of daily rainfall (a,b,c), wind speed (d,e,f) and concurrent extremes (g,h,i) across Singapore at 90th-, 95th- and 98th-percentile thresholds

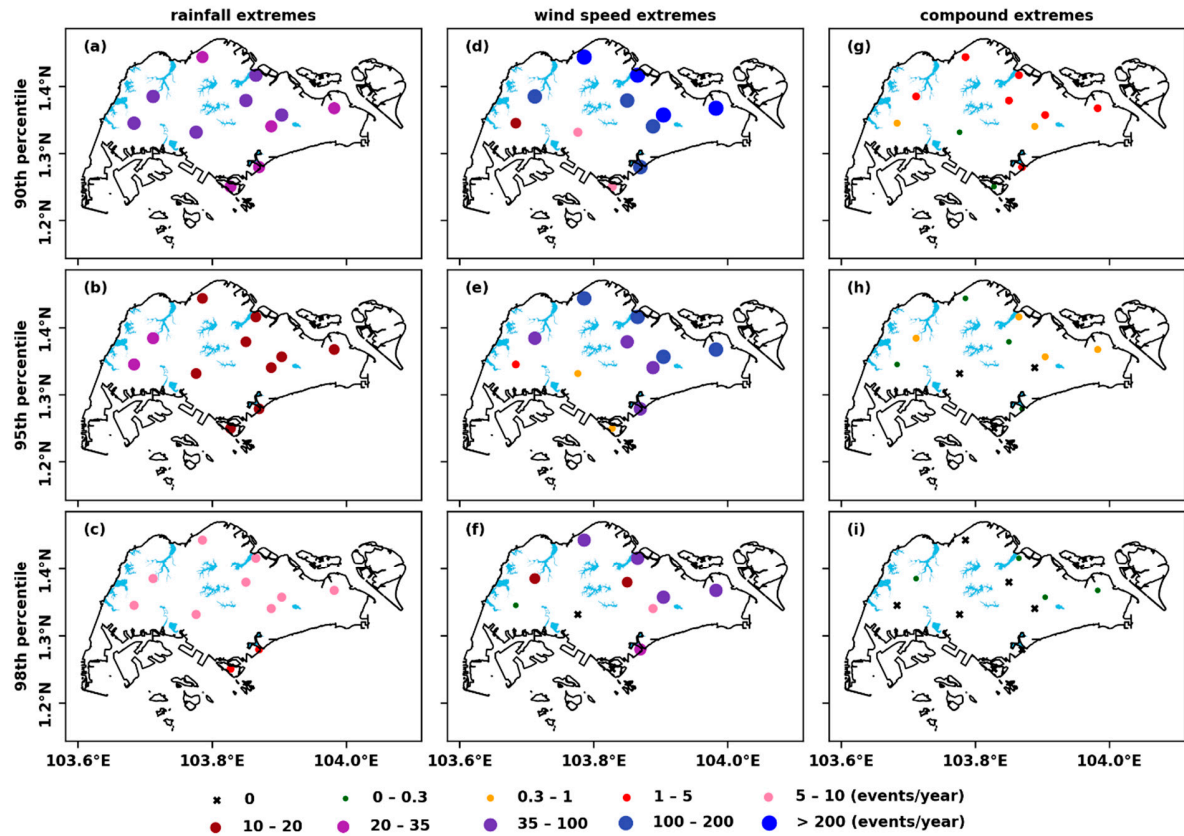

**Figure S2.** Frequency (events/year) of 3-hourly rainfall (a,b,c), wind speed (d,e,f) and concurrent extremes (g,h,i) across Singapore at 90th-, 95th- and 98th-percentile thresholds
